# Supplementary material
Source: PubMed Central journal article supplement (PMC4616960)
Supplement: AEM.02392-15_zam999116729so1.pdf [file AEM.02392-15_zam999116729so1.pdf]

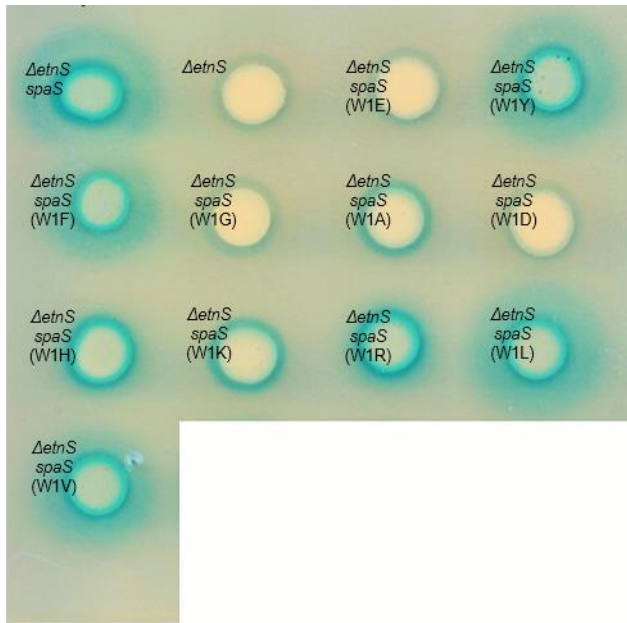

Fig. S1: Rapid plate assay for production and autoinduction ability of subtilin mutants and strains. LB agar plate is supplemented with X-Gal and subtilin reporter strain B6633.MB1. Samples of cultures were spotted onto the plates. Positive and negative controls are B15029.TSp03 ( $\Delta etnS$ ,  $spaS^+$ ) and B15029.TSp03 ( $\Delta etnS$ ), respectively. Letters in brackets indicate the amino acids residue exchange of the respective subtilin mutant.
